# Supplementary material for: Using light to shape chemical gradients for parallel and automated analysis of chemotaxis
Source: PubMed Central journal article supplement (PMC4422560; doi:10.15252/msb.20156027), 2015-04-23
Supplement: msb0011-0804-sd1.pdf [file msb0011-0804-sd1.pdf]

# Supplementary Figure 1

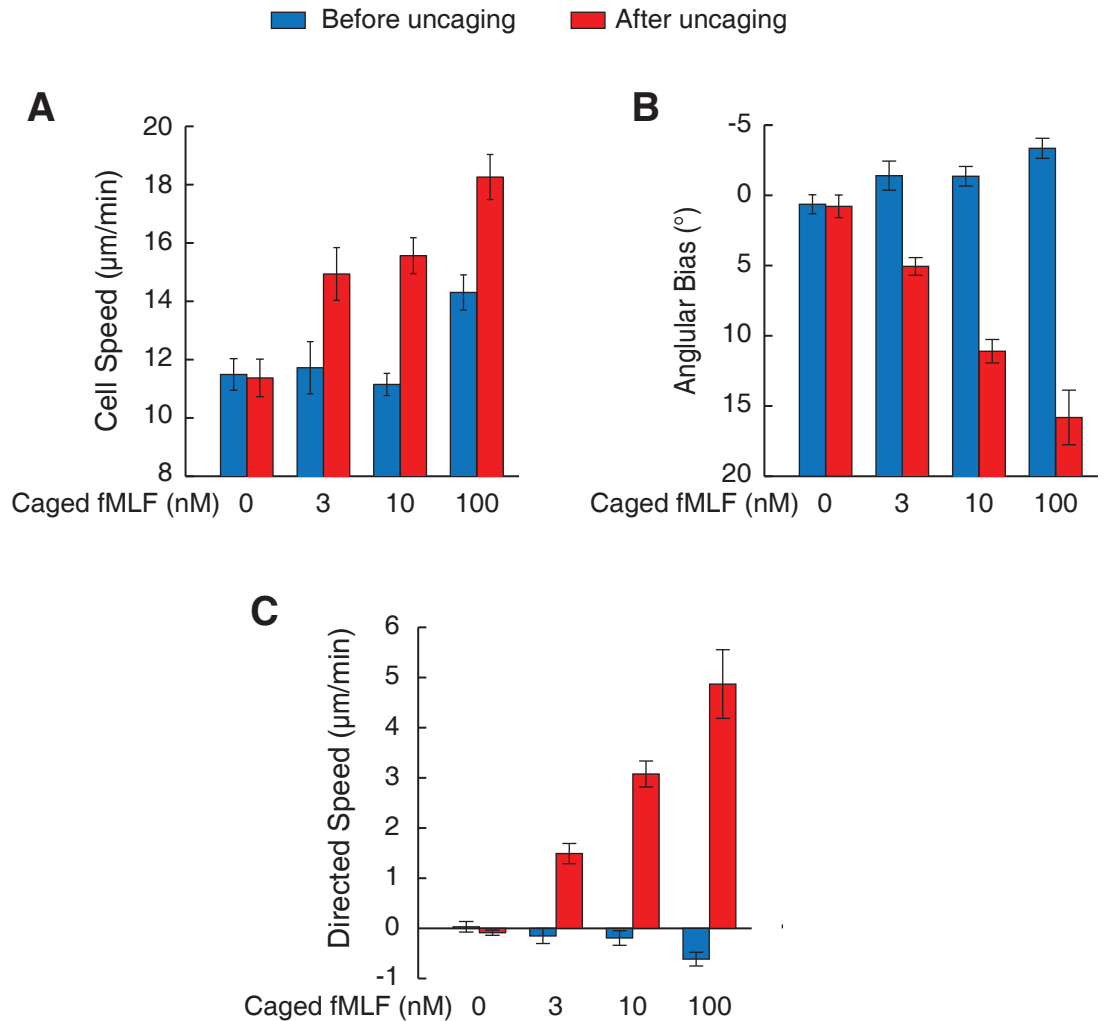

## Supplementary Figure S1. Dose-dependent chemotactic responses to gradients of fMLF generated by uncaging.

**A,B,C.** Mean cell speed (A), angular bias (B), and directed speed (C) before (blue) and after (red) generation of gradients from the indicated concentrations of caged fMLF (Nv-fMLF).
